# Supplementary material
Source: Springer Nature journal article supplement (https://www.springermedizin.de/resource/supplementary/12936_2013_2745_MOESM2_ESM.pdf/9544176)
Supplement: MOESM2 [file 9544176]

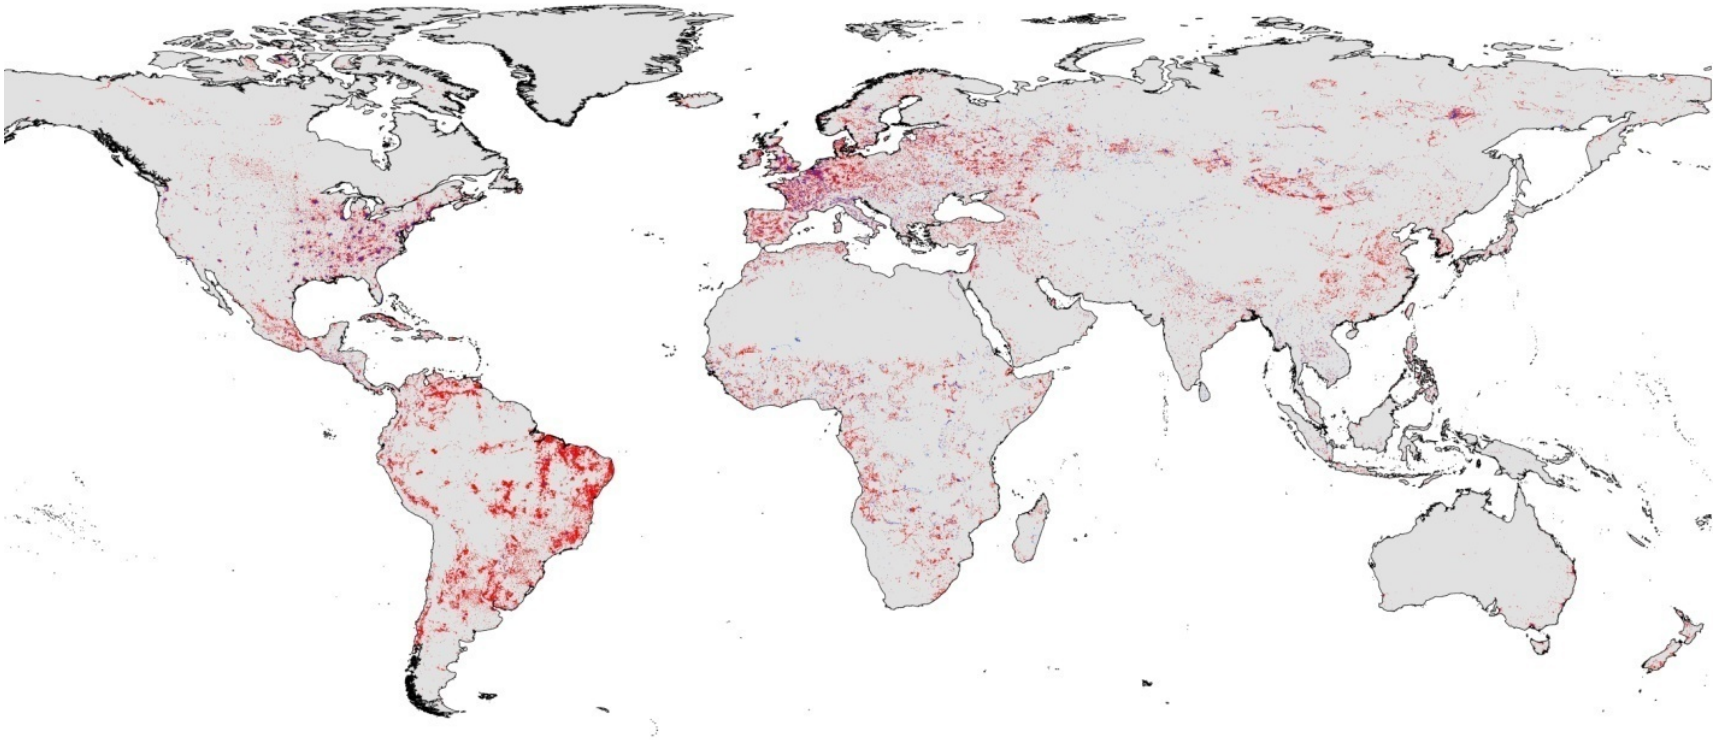

*Change in urban extent between 1900 and 2000. Blue denotes urban areas existing in 1900, red denotes those that have developed since.*
